# Supplementary material for: Ready or Not, AI Comes— An Interview Study of Organizational AI Readiness Factors
Source: Springer Nature journal article supplement (doi:10.1007/s12599-020-00676-7), 2020-12-22

# Ready or Not, AI Comes – An Interview Study of Organizational AI Readiness Factors

Jan Jöhnk, Malte Weißert, Katrin Wyrski

Business & Information Systems Engineering (2021)

Appendix (available online via <http://link.springer.com>)

# Online Appendix

## Appendix I: Theoretical Foundation

**Table 2: Literature Overview of Our Theoretical Foundation**

| Literature stream                   | Core insights                                                                                                                                                                                                                                                                                                                                                                                                                                                                                                                                                                                                                                                                                                                                                   | Key references                                                                                                 |
|-------------------------------------|-----------------------------------------------------------------------------------------------------------------------------------------------------------------------------------------------------------------------------------------------------------------------------------------------------------------------------------------------------------------------------------------------------------------------------------------------------------------------------------------------------------------------------------------------------------------------------------------------------------------------------------------------------------------------------------------------------------------------------------------------------------------|----------------------------------------------------------------------------------------------------------------|
| Innovation and technology adoption  | <ul style="list-style-type: none"> <li>- Innovation adoption is defined as a process with different phases</li> <li>- Within the process, several factors determine the adoption decision</li> <li>- The research investigated factors and antecedents to technology adoption on an organizational level (e.g., DOI and TOE) or acceptance on an individual level (e.g., TAM and TPB)</li> <li>- Theory needs to be tailored to the adoption context</li> </ul>                                                                                                                                                                                                                                                                                                 | Chwelos et al. 2001; Davis 1985; Frambach and Schillewaert 2002; Hameed et al. 2012; Oliveira and Martins 2011 |
| Organizational readiness for change | <ul style="list-style-type: none"> <li>- Readiness is a state, which is attained before a specific activity takes place</li> <li>- Precursor condition for implementation of a change such as innovation, technology, etc.</li> <li>- Systematic reviews identify that the organizational readiness construct is not yet well-defined</li> <li>- Discussed factors comprise change valence, change efficacy, and contextual factors</li> </ul>                                                                                                                                                                                                                                                                                                                  | Armenakis et al. 1993; Helfrich et al. 2011; Rafferty et al. 2013; Shahrabadi and Paré 2014; Weiner 2009       |
| (Digital) readiness in IS           | <ul style="list-style-type: none"> <li>- The literature discusses readiness for technology adoption in the context of systems implementation, knowledge management, e-readiness, and Green IT readiness</li> <li>- Organizational readiness affects the probability of successful technology adoption</li> <li>- Readiness is a capability which requires continuous improvement</li> <li>- Typical variables have been employed: financial resources, IT sophistication, management support, trading partner readiness, elapsed time since adoption, organizational culture, communication of goals, individual attitude, commitment</li> <li>- Digital readiness is conceptualized as digital assets, digital capabilities, and digital commitment</li> </ul> | Abdinnour-Helm et al. 2003; Lokuge et al. 2018; Molla and Licker 2005; Nguyen et al. 2019; Snyder-Halpern 2001 |
| AI readiness                        | <ul style="list-style-type: none"> <li>- The literature on AI adoption and AI readiness is limited to a few qualitative studies</li> <li>- Two main contributions (Alsheibani et al. 2019; Pumplun et al. 2019) gather and list factors within the TOE model which determine AI adoption</li> </ul>                                                                                                                                                                                                                                                                                                                                                                                                                                                             | Alsheibani et al. 2018; Pumplun et al. 2019                                                                    |

## Appendix II: Overview of Interview Experts

Table 3: Overview of Interview Experts

| ID   | Interviewee Position                                            | Industry             | Company Size | AI Adoption Stage | Duration (minutes) |
|------|-----------------------------------------------------------------|----------------------|--------------|-------------------|--------------------|
| E01* | Senior Data Scientist                                           | Automotive           | <100.000     | Continued Use     | 53                 |
| E02* | Director Digital Transformation                                 |                      |              |                   |                    |
| E03  | Chief Business Officer                                          | IT                   | <10          | Continued Use     | 58                 |
| E04  | Managing Partner                                                | Venture Capital      | <50          | Awareness         | 60                 |
| E05  | IT Architect Enterprise Operations Center & Workload Automation | IT                   | >100.000     | Continued Use     | 61                 |
| E06  | Professor for Innovation and Technology Management              | Research             | <10          | Awareness         | 50                 |
| E07  | Head of Asset Intelligence Center                               | Logistics            | <50.000      | Evaluation        | 55                 |
| E08  | Digital Advisor                                                 | Software             | >100.000     | Continued Use     | 70                 |
| E09  | Senior Digital Expert                                           | Manufacturing        | <25.000      | Intention         | 57                 |
| E10  | Head of Strategy and Innovation                                 | IT                   | <50          | Continued Use     | 66                 |
| E11  | Managing Director                                               | IT                   | <50          | Continued Use     | 52                 |
| E12  | Member of the Executive Board                                   | Insurance            | <5000        | Evaluation        | 49                 |
| E13  | Head of Operations                                              | Healthcare           | <50          | Continued Use     | 53                 |
| E14  | Head of Functional Controlling                                  | Pharma & Agriculture | >100.000     | Continued Use     | 56                 |
| E15  | Director                                                        | Automotive           | <50          | Intention         | 62                 |
| E16  | Vice President Core Business Apps                               | Manufacturing        | <25.000      | Consideration     | 56                 |
| E17  | CIO                                                             | Automotive           | >100.000     | Continued Use     | 79                 |
| E18  | Head of IT                                                      | Construction         | <100.000     | Intention         | 54                 |
| E19  | Head of Digital Unit                                            | Manufacturing        | <5000        | Consideration     | 46                 |
| E20  | CIO / Vice President IT                                         | Automotive           | <100.000     | Intention         | 58                 |
| E21  | CEO                                                             | IT                   | <50          | Continued Use     | 58                 |
| E22  | CEO                                                             | Automotive           | <50          | Continued Use     | 49                 |
| E23  | CEO                                                             | Consulting           | <500         | Awareness         | 53                 |
| E24  | Head of Center of Excellence IT Automation                      | Manufacturing        | <25.000      | Consideration     | 58                 |
| E25  | CEO                                                             | IT                   | <250         | Continued Use     | 72                 |

\* Note that E01 and E02 are respondents from the same company and were interviewed in the same interview meeting

### ***Appendix III: Explicating and Validating the AI Readiness Factors***

For a comprehensive AI readiness assessment, we developed indicators with insights from our expert interviews, the literature, and practitioner studies. To the best of our knowledge, the research does not yet provide such detailed indicators. To ensure a rigor approach, we referred to established procedures for scale development (Boateng et al. 2018). Specifically, we paid attention to ensure unambiguity and simplicity and to prevent exceptionally lengthy measures (DeVellis 2017). Thus, our first draft of indicators resulted in 76 indicators that explicated the 23 preliminary AI readiness factors.

Finally, we gathered a focus group of seven AI-related researchers to perform a card-sorting procedure of our categories, factors, and indicators in a joint workshop. Card-sorting assesses the construct validity and identifies ambiguous measures (Moore and Benbasat 1991). Thus, the results helped us to validate our initial categorization and further improve our factors and indicators. We asked the focus group members to assign the randomized indicators to the list of factors and to rate their confidence level in the assignment. One author moderated and discussed personal feedback of the focus group during and after the assignment. This provided us with additional insights into focus group members' understanding and potential areas for improvement.

Overall, the card-sorting scored a hit ratio of 72.74%. Despite mostly satisfying results, the card-sorting also revealed weaknesses in some AI readiness factors (see **Table 4**). Particularly, the average hit ratios of data-related factors (62.43%) were lower compared to non-data-related factors (78.43%). While this is partly dependent on the focus group constellation, we also took measures to account for the received feedback. For instance, we improved the wording of some factors to improve comprehensibility. Further, we restructured all data factors to depict data criteria (i.e. characteristics and their management) instead of a distinction between data characteristics and data management factors. We also improved the indicators' wording to avoid ambiguities. For instance, we replaced the word 'aware' in some indicators to avoid unintended links to the factor 'AI awareness'. In rare instances, we dropped indicators altogether because of particularly low hit ratios or missing AI-specifics. This procedure led to our final compilation of 18 AI readiness factors organized in five categories and operationalized by 58 indicators (see **Table 5**).

Table 4 Card-Sorting Hit Ratios

| Factor   | Comp | CuAiR | ToMaSu | ProAiAl | FinBud | AiExp | ItInf | AiAwa | Ups | EtaCo | Inno | CollWo | ChaMa | IterDe | DaAmo | DaTy | DaQua | DaAcc | DaFlo | DaCo | DaPre | DaAna | DaPo | Ambiguous | Total Sorts | % Hits |         |
|----------|------|-------|--------|---------|--------|-------|-------|-------|-----|-------|------|--------|-------|--------|-------|------|-------|-------|-------|------|-------|-------|------|-----------|-------------|--------|---------|
| Comp*    | 9    | 1     | 0      | 7       | 0      | 0     | 0     | 6     | 0   | 0     | 3    | 0      | 0     | 0      | 0     | 0    | 0     | 0     | 0     | 0    | 0     | 0     | 0    | 0         | 2           | 28     | 32.14%  |
| CuAiR    | 0    | 23    | 2      | 0       | 0      | 0     | 0     | 1     | 0   | 0     | 1    | 0      | 0     | 0      | 0     | 0    | 0     | 0     | 0     | 0    | 0     | 0     | 1    | 0         | 0           | 28     | 82.14%  |
| ToMaSu   | 0    | 0     | 21     | 0       | 0      | 0     | 0     | 0     | 0   | 0     | 0    | 0      | 0     | 0      | 0     | 0    | 0     | 0     | 0     | 0    | 0     | 0     | 0    | 0         | 0           | 21     | 100.00% |
| ProAiAl* | 0    | 0     | 0      | 18      | 0      | 0     | 0     | 0     | 0   | 0     | 2    | 0      | 1     | 0      | 0     | 0    | 0     | 0     | 0     | 0    | 0     | 0     | 0    | 0         | 0           | 21     | 85.71%  |
| FinBud   | 0    | 0     | 0      | 0       | 21     | 0     | 0     | 0     | 0   | 0     | 0    | 0      | 0     | 0      | 0     | 0    | 0     | 0     | 0     | 0    | 0     | 0     | 0    | 0         | 0           | 21     | 100.00% |
| AiExp*   | 1    | 0     | 0      | 0       | 1      | 15    | 0     | 2     | 0   | 0     | 0    | 2      | 0     | 0      | 0     | 0    | 0     | 0     | 0     | 0    | 0     | 0     | 0    | 0         | 0           | 21     | 71.43%  |
| ItInf    | 0    | 0     | 0      | 0       | 0      | 0     | 21    | 0     | 0   | 0     | 0    | 0      | 0     | 0      | 0     | 0    | 0     | 0     | 0     | 0    | 0     | 0     | 0    | 0         | 0           | 21     | 100.00% |
| AiAwa*   | 0    | 0     | 0      | 0       | 0      | 1     | 0     | 25    | 2   | 0     | 0    | 0      | 0     | 0      | 0     | 0    | 0     | 0     | 0     | 0    | 0     | 0     | 0    | 0         | 0           | 28     | 89.29%  |
| Ups      | 0    | 0     | 0      | 0       | 1      | 0     | 0     | 0     | 23  | 0     | 0    | 4      | 0     | 0      | 0     | 0    | 0     | 0     | 0     | 0    | 0     | 0     | 0    | 0         | 0           | 28     | 82.14%  |
| EtaCo*   | 1    | 0     | 0      | 1       | 0      | 0     | 0     | 0     | 0   | 17    | 0    | 0      | 0     | 0      | 0     | 0    | 0     | 0     | 0     | 0    | 0     | 0     | 1    | 1         | 21          | 80.95% |         |
| Inno     | 1    | 0     | 0      | 0       | 0      | 0     | 0     | 1     | 2   | 0     | 17   | 3      | 1     | 0      | 0     | 0    | 0     | 0     | 0     | 0    | 0     | 0     | 0    | 0         | 3           | 28     | 60.71%  |
| CollWo   | 1    | 0     | 2      | 1       | 1      | 2     | 0     | 0     | 0   | 0     | 1    | 13     | 0     | 0      | 0     | 0    | 0     | 0     | 0     | 0    | 0     | 0     | 0    | 0         | 0           | 21     | 61.90%  |
| ChaMa    | 1    | 0     | 1      | 0       | 0      | 1     | 0     | 0     | 0   | 0     | 0    | 0      | 17    | 0      | 0     | 0    | 0     | 0     | 0     | 0    | 0     | 0     | 0    | 0         | 1           | 21     | 80.95%  |
| IterDe*  | 0    | 0     | 0      | 0       | 0      | 0     | 2     | 0     | 0   | 0     | 0    | 2      | 0     | 29     | 0     | 0    | 0     | 0     | 0     | 0    | 0     | 0     | 0    | 0         | 2           | 35     | 82.86%  |
| DaAmo*   | 0    | 0     | 0      | 1       | 0      | 0     | 0     | 0     | 0   | 0     | 0    | 0      | 0     | 0      | 2     | 3    | 0     | 6     | 1     | 1    | 0     | 0     | 0    | 0         | 0           | 14     | 14.29%  |
| DaTy*    | 0    | 0     | 0      | 0       | 0      | 0     | 0     | 0     | 0   | 0     | 0    | 0      | 0     | 0      | 0     | 8    | 0     | 0     | 0     | 0    | 6     | 0     | 0    | 0         | 0           | 14     | 57.14%  |
| DaQua    | 0    | 0     | 0      | 0       | 0      | 0     | 0     | 0     | 0   | 0     | 0    | 0      | 0     | 0      | 0     | 2    | 16    | 0     | 0     | 2    | 1     | 0     | 0    | 0         | 0           | 21     | 76.19%  |
| DaAcc    | 0    | 0     | 0      | 0       | 0      | 0     | 0     | 0     | 0   | 0     | 0    | 0      | 0     | 0      | 0     | 1    | 0     | 26    | 0     | 0    | 0     | 0     | 1    | 0         | 0           | 28     | 92.86%  |
| DaFlo    | 0    | 0     | 0      | 0       | 0      | 0     | 2     | 0     | 0   | 0     | 0    | 0      | 0     | 0      | 0     | 2    | 0     | 0     | 17    | 0    | 0     | 0     | 0    | 0         | 0           | 21     | 80.95%  |
| DaCo*    | 0    | 0     | 0      | 0       | 0      | 0     | 0     | 0     | 0   | 0     | 0    | 0      | 0     | 0      | 8     | 0    | 0     | 0     | 0     | 12   | 1     | 0     | 0    | 0         | 0           | 21     | 57.14%  |
| DaPre*   | 1    | 0     | 0      | 2       | 0      | 0     | 0     | 0     | 0   | 0     | 0    | 0      | 0     | 0      | 0     | 0    | 10    | 0     | 0     | 2    | 8     | 4     | 0    | 1         | 0           | 28     | 28.57%  |
| DaAna*   | 4    | 0     | 1      | 0       | 0      | 1     | 2     | 0     | 0   | 0     | 0    | 0      | 0     | 0      | 0     | 0    | 0     | 0     | 0     | 0    | 0     | 12    | 0    | 1         | 0           | 21     | 57.14%  |
| DaPo*    | 0    | 0     | 0      | 0       | 0      | 0     | 0     | 0     | 0   | 3     | 0    | 0      | 0     | 1      | 0     | 0    | 0     | 0     | 0     | 0    | 0     | 0     | 17   | 0         | 0           | 21     | 80.95%  |

Abbreviations

|         |                        |        |                       |        |                       |       |                  |
|---------|------------------------|--------|-----------------------|--------|-----------------------|-------|------------------|
| Comp    | Compatibility          | ItInf  | IT infrastructure     | ChaMa  | Change management     | DaFlo | Data flow        |
| CuAiR   | Customer AI readiness  | AiAwa  | AI awareness          | IterDe | Iterative development | DaCo  | Data collection  |
| ToMaSu  | Top management support | Ups    | Upskilling            | DaAmo  | Data amount           | DaPre | Data preparation |
| ProAiAl | Process AI alignment   | EtaCo  | Ethics and compliance | DaTy   | Data type             | DaAna | Data analytics   |
| FinBud  | Financial budget       | Inno   | Innovativeness        | DaQua  | Data quality          | DaPo  | Data processing  |
| AiExp   | AI experts             | CollWo | Collaborative work    | DaAcc  | Data accessibility    |       |                  |

\*Factors with changes after card-sorting (renamed, dropped, or restructured with other factors)

## Appendix IV: Overview of AI Readiness Categories, Factors, and Indicators

**Table 5** Overview of AI Readiness Categories, Factors, and Illustrative Indicators

| Abbreviation                     | Illustrative AI readiness indicators                                                                                                                                                                                                                                                                                                        | Key References                                                                                                                                                                                                                                                         |
|----------------------------------|---------------------------------------------------------------------------------------------------------------------------------------------------------------------------------------------------------------------------------------------------------------------------------------------------------------------------------------------|------------------------------------------------------------------------------------------------------------------------------------------------------------------------------------------------------------------------------------------------------------------------|
| <i>Strategic Alignment:</i>      | AI adoption needs to be aligned with the overall strategy of an organization. As such, the category <i>strategic alignment</i> is defined as the tight linkage of organizational priorities and processes enabling and supporting this adoption process.                                                                                    |                                                                                                                                                                                                                                                                        |
| AiBuPo1<br>AiBuPo2<br>AiBuPo3    | <u>AI-business potential</u><br>My organization has business problems and opportunities that are suited to be addressed by AI.<br>AI technologies offer potential benefits for the organization's business.<br>My organization has appropriate methods and procedures for AI use case discovery.                                            | <ul style="list-style-type: none"> <li>E01, E03, E08, E10, E13, E18, E22</li> <li>Alsheibani et al. 2018; Groopman 2018; Hofmann et al. 2020; PA Office of Administration 2018; Pringle and Zoller 2018; Pumplun et al. 2019</li> </ul>                                |
| CuAiR1<br>CuAiR2<br>CuAiR3       | <u>Customer AI readiness</u><br>My organization's customers are likely to accept AI-integrated offerings.<br>My organization's customers have adequate expectations toward AI-integrated offerings.<br>My organization's customers have error tolerance toward AI-integrated offerings.                                                     | <ul style="list-style-type: none"> <li>E03, E08, E11, E24</li> <li>Groopman 2018; Pumplun et al. 2019</li> </ul>                                                                                                                                                       |
| ToMaSu1<br>ToMaSu2<br>ToMaSu3    | <u>Top management support</u><br>Top management integrates AI adoption into the strategy of the organization.<br>Top management is willing to actively pursue AI adoption through initiatives and projects.<br>Top management is willing to support bottom-up AI initiatives.                                                               | <ul style="list-style-type: none"> <li>E08, E10, E13, E18</li> <li>Alsheibani et al. 2018; Catalyst Fund 2020; Groopman 2018; Intel 2018; Kruse et al. 2019; Microsoft 2020; PA Office of Administration 2018; Pringle and Zoller 2018; Pumplun et al. 2019</li> </ul> |
| PrAiFit1<br>PrAiFit2<br>PrAiFit3 | <u>AI-process fit</u><br>My organization documents and standardizes business processes and operations.<br>My organization is willing to implement new business processes and operations to enable AI-integrated workflows.<br>My organization is willing to reengineer business processes and operations to enable AI-integrated workflows. | <ul style="list-style-type: none"> <li>E09, E11, E16, E24</li> <li>Groopman 2018; Microsoft 2020; Pumplun et al. 2019</li> </ul>                                                                                                                                       |
| DaDriDM1<br>DaDriDM2             | <u>Data-driven decision-making</u><br>My organization is capable to create insights with data-driven analytics.<br>The decisions that are made in my organization are based on data-driven insights.                                                                                                                                        | <ul style="list-style-type: none"> <li>E10, E15</li> <li>Catalyst Fund 2020; Groopman 2018; Microsoft 2020</li> </ul>                                                                                                                                                  |
| <i>Resources:</i>                | Considering AI's inherent complexity, organizations need dedicated resources to steer the development of related assets, capabilities, and commitment. Thus, the category <i>resources</i> considers AI-related financial, personnel, and infrastructural resources.                                                                        |                                                                                                                                                                                                                                                                        |
| FinBud1<br>FinBud2               | <u>Financial budget</u><br>My organization has allocated financial resources for AI adoption.<br>My organization is willing to spend financial resources on AI projects with a high amount of risk and uncertainty.                                                                                                                         | <ul style="list-style-type: none"> <li>E08, E09, E10</li> <li>Alsheibani et al. 2019; Kruse et al. 2019; Pringle and Zoller 2018; Pumplun et al. 2019</li> </ul>                                                                                                       |
| Per1<br>Per2<br>Per3             | <u>Personnel</u><br>My organization has employees with AI know-how.<br>My organization has AI specialists who have a deep understanding of AI technologies.<br>My organization has business analysts who possess both domain and AI know-how.                                                                                               | <ul style="list-style-type: none"> <li>E03, E05, E08, E10</li> <li>Alsheibani et al. 2018; Catalyst Fund 2020; Groopman 2018; Intel 2018; Kruse et al. 2019; Microsoft 2020; PA Office of Administration 2018; Pumplun et al. 2019</li> </ul>                          |
| ItInf1<br>ItInf2<br>ItInf3       | <u>IT infrastructure</u><br>My organization's IT infrastructure facilitates data availability, data accessibility, and data flow.<br>My organization's IT infrastructure can provide processing power for AI workloads.<br>My organization's IT infrastructure is modular and allows for the integration of new applications.               | <ul style="list-style-type: none"> <li>E01, E03, E10, E11, E13, E14, E15</li> <li>Alsheibani et al. 2018; Catalyst Fund 2020; Groopman 2018; Intel 2018; Kruse et al. 2019</li> </ul>                                                                                  |

|                                                                |                                                                                                                                                                                                                                                                                                                                                                                                                                                                                                                                                                                                                                                                               |                                                                                                                                                                                                                                           |
|----------------------------------------------------------------|-------------------------------------------------------------------------------------------------------------------------------------------------------------------------------------------------------------------------------------------------------------------------------------------------------------------------------------------------------------------------------------------------------------------------------------------------------------------------------------------------------------------------------------------------------------------------------------------------------------------------------------------------------------------------------|-------------------------------------------------------------------------------------------------------------------------------------------------------------------------------------------------------------------------------------------|
| <i>Knowledge:</i>                                              | Since AI raises questions regarding the applicability and explainability of underlying intelligent techniques, the category <i>knowledge</i> reflects the adequate understanding and expectations of employees toward AI                                                                                                                                                                                                                                                                                                                                                                                                                                                      |                                                                                                                                                                                                                                           |
| AiAwa1<br>AiAwa2<br>AiAwa3                                     | <u>AI awareness</u><br>Employees in my organization are aware of AI's opportunities.<br>Employees in my organization are aware of how AI works.<br>Employees in my organization have adequate expectations toward AI.                                                                                                                                                                                                                                                                                                                                                                                                                                                         | <ul style="list-style-type: none"> <li>• E01, E03, E09, E10, E15, E19</li> <li>• Catalyst Fund 2020; Kruse et al. 2019; Pringle and Zoller 2018</li> </ul>                                                                                |
| Ups1<br>Ups2<br>Ups3                                           | <u>Upskilling</u><br>Employees in my organization have access to a wide range of upskilling programs.<br>Employees in my organization are encouraged to learn new skills.<br>Employees in my organization are willing to take part in upskilling programs.                                                                                                                                                                                                                                                                                                                                                                                                                    | <ul style="list-style-type: none"> <li>• E01, E05, E12, E17, E23, E01, E03, E09, E10, E15, E19</li> <li>• Groopman 2018; Intel 2018; Microsoft 2020</li> </ul>                                                                            |
| AiEth1<br>AiEth2<br>AiEth3                                     | <u>AI ethics</u><br>My organization has measures to ensure compliant and ethical conduct.<br>My organization acknowledges that AI poses challenges to algorithmic decisions' explainability.<br>My organization acknowledges that AI requires new measures in order to prevent discrimination and safety violations.                                                                                                                                                                                                                                                                                                                                                          | <ul style="list-style-type: none"> <li>• E08, E15, E16</li> <li>• Catalyst Fund 2020; Groopman 2018; Kruse et al. 2019; Microsoft 2020; PA Office of Administration 2018</li> </ul>                                                       |
| <i>Culture:</i>                                                | The category <i>culture</i> considers creating an environment that facilitates an openness toward innovation and change for AI adoption on an organizational and individual level.                                                                                                                                                                                                                                                                                                                                                                                                                                                                                            |                                                                                                                                                                                                                                           |
| Inno1<br>Inno2<br>Inno3                                        | <u>Innovativeness</u><br>Employees in my organization experiment to improve established assumptions and practices.<br>Employees in my organization are willing to innovate radically.<br>Employees in my organization are willing to innovate rapidly.                                                                                                                                                                                                                                                                                                                                                                                                                        | <ul style="list-style-type: none"> <li>• E03, E11, E12, E13, E16</li> <li>• Catalyst Fund 2020; Groopman 2018; Microsoft 2020; Pumplun et al. 2019</li> </ul>                                                                             |
| CollWo1<br>CollWo2                                             | <u>Collaborative work</u><br>My organization has formats and tools to foster collaboration between domain experts, AI specialists, and IT.<br>My organization is willing to facilitate intraorganizational collaboration between domain experts, AI specialists, and IT through new formats and tools.                                                                                                                                                                                                                                                                                                                                                                        | <ul style="list-style-type: none"> <li>• E05, E12, E18</li> <li>• Catalyst Fund 2020; Groopman 2018; Microsoft 2020</li> </ul>                                                                                                            |
| ChaMa1<br>ChaMa2<br>ChaMa3                                     | <u>Change management</u><br>My organization manages resistance to change effectively.<br>Change champions, multipliers, and consultants facilitate organizational change in my organization.<br>My organization is willing to provide resources and guidance to handle AI-induced change.                                                                                                                                                                                                                                                                                                                                                                                     | <ul style="list-style-type: none"> <li>• E02, E07, E08, E10, E16, E24</li> <li>• Pumplun et al. 2019</li> </ul>                                                                                                                           |
| <i>Data:</i>                                                   | The category <i>data</i> comprises assets, capabilities, and commitment to ensure high data availability, quality, accessibility, and flow.                                                                                                                                                                                                                                                                                                                                                                                                                                                                                                                                   |                                                                                                                                                                                                                                           |
| DAvail1<br>DAvail2<br>DAvail3<br>DAvail4<br>DAvail5<br>DAvail6 | <u>Data availability</u><br>My organization has extensive amounts of data about resources, processes, transactions, and other events related to my organization.<br>Data about resources, processes, transactions, and other events related to my organization is digitally available instead of paper-based.<br>Data within my organization is available in the form of structured data.<br>My organization has methods and procedures to transform unstructured or semi-structured data into structured data.<br>My organization has data that is relevant for potential AI use cases.<br>My organization regularly identifies and establishes new sources to collect data. | <ul style="list-style-type: none"> <li>• E03, E05, E08, E10, E11, E12, E13, E22, E24</li> <li>• Catalyst Fund 2020; Groopman 2018; Intel 2018; Kruse et al. 2019; Microsoft 2020; Pringle and Zoller 2018; Pumplun et al. 2019</li> </ul> |
| DaQua1<br>DaQua2<br>DaQua3                                     | <u>Data quality</u><br>Data within my organization represents real-world events.<br>Data within my organization is correct.<br>Data within my organization is complete.                                                                                                                                                                                                                                                                                                                                                                                                                                                                                                       | <ul style="list-style-type: none"> <li>• E08, E11, E13, E15, E24</li> <li>• Catalyst Fund 2020; Groopman 2018; Kruse et al. 2019; PA Office of Administration 2018; Pringle and Zoller 2018; Pumplun et al. 2019</li> </ul>               |

|                                      |                                                                                                                                                                                                                                                                                                                     |                                                                                                                                 |
|--------------------------------------|---------------------------------------------------------------------------------------------------------------------------------------------------------------------------------------------------------------------------------------------------------------------------------------------------------------------|---------------------------------------------------------------------------------------------------------------------------------|
| DaQua4<br>DaQua5<br>DaQua6           | My organization has methods and procedures for anomaly detection.<br>My organization has methods and procedures for data cleaning.<br>My organization has methods and procedures for data quality assurance.                                                                                                        |                                                                                                                                 |
| DaAcc1<br>DaAcc2<br>DaAcc3<br>DaAcc4 | <u>Data accessibility</u><br>Data within my organization is quickly and easily retrievable.<br>Data within my organization is accessible through centralized data sources.<br>Data within my organization is accessible across different departments.<br>Ways to access data within my organization are documented. | <ul style="list-style-type: none"> <li>• E03, E08, E12, E13</li> <li>• Catalyst Fund 2020; Groopman 2018; Intel 2018</li> </ul> |
| DaFlo1<br>DaFlo2<br>DaFlo3           | <u>Data flow</u><br>My organization moves data from its source to its use in an automated manner.<br>In my organization, moving data from its source to its use does not produce data corruption.<br>In my organization, technological bottlenecks do not hamper moving data from its source to its use.            | <ul style="list-style-type: none"> <li>• E08, E10, E13, E24</li> <li>• Catalyst Fund 2020; Groopman 2018</li> </ul>             |



## Appendix V: Exemplary AI Readiness Assessment

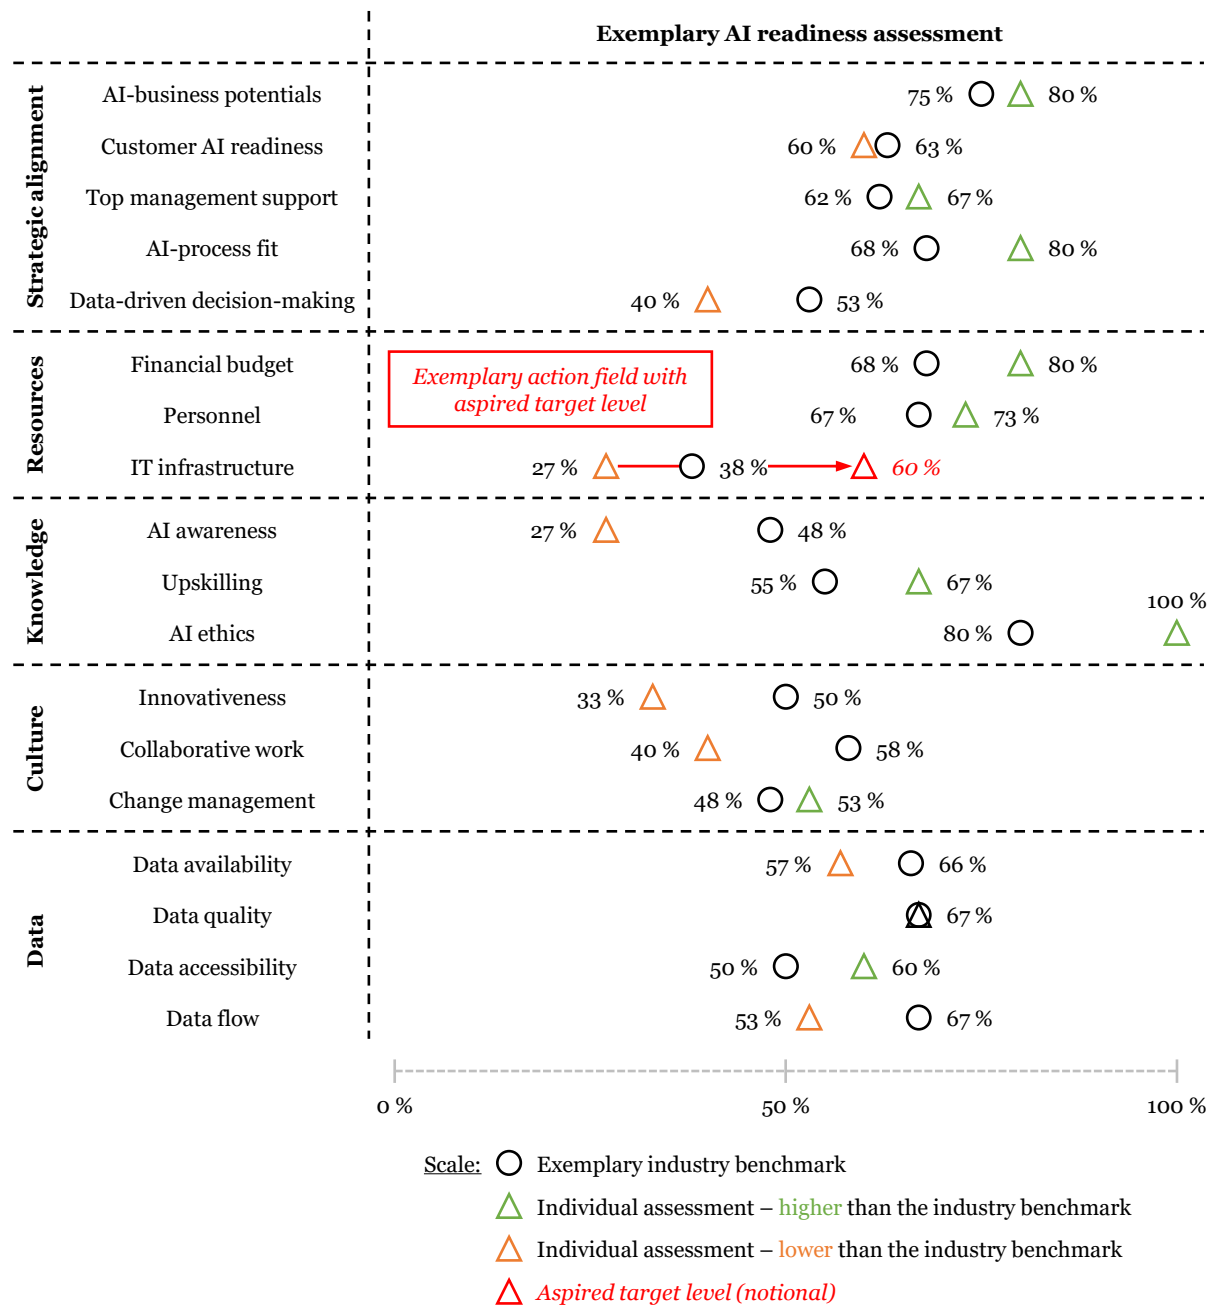

Supplement: 12599_2020_676_MOESM1_ESM.pdf [file 12599_2020_676_MOESM1_ESM.pdf]
